# Supplementary material for: Nuclear Factor I genomic binding associates with chromatin boundaries
Source: PubMed Central journal article supplement (PMC3610271; doi:10.1186/1471-2164-14-99), 2013-02-12
Supplement: 1471-2164-14-99-S2.pdf [file 1471-2164-14-99-S2.pdf]

## Additional file 2.

**Table S1. DNA motifs found with the program peak-motifs in peak lists obtained with different tag thresholds**

A) Motifs found in peak list obtained with tag threshold 5 (14487 peaks)

| Motif                              | Logo                                                                                | 3 Top hits in databases                                 |
|------------------------------------|-------------------------------------------------------------------------------------|---------------------------------------------------------|
| oligos_7nt_mkv5_m1<br>(1790 sites) |    | versus jasper_core vertebrates:<br>ARID3A,              |
| oligos_7nt_mkv5_m2<br>(1689 sites) |    | versus jasper_core vertebrates:<br>FOXI1,               |
| oligos_7nt_mkv5_m3<br>(1279 sites) |    | versus jasper_core vertebrates:<br>ZEB1, Klf4, ZNF354C, |
| dyads_m1<br>(168 sites)            |    | versus jasper_core vertebrates:<br>FOXI1, Foxd3,        |
| dyads_m2<br>(1042 sites)           |   | versus jasper_core vertebrates:<br>TLX1::NFIC,          |
| dyads_m3<br>(5377 sites)           |  | versus jasper_core vertebrates:<br>no match             |

B) Motifs found in peak list obtained with tag threshold 6 (4795 peaks)

| Motif                             | Logo                                                                                | 3 Top hits in databases                                       |
|-----------------------------------|-------------------------------------------------------------------------------------|---------------------------------------------------------------|
| oligos_7nt_mkv4_m1<br>(357 sites) | 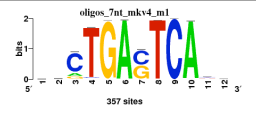 | versus jasper_core vertebrates:<br>AP1, NFE2L2, NFE2L1::MafG, |
| oligos_7nt_mkv4_m2<br>(416 sites) |  | versus jasper_core vertebrates:<br>IRF1,                      |
| oligos_7nt_mkv4_m3<br>(604 sites) |  | versus jasper_core vertebrates:<br>SP1,                       |
| dyads_m1<br>(347 sites)           |  | versus jasper_core vertebrates:<br>TLX1::NFIC,                |
| dyads_m2<br>(47 sites)            |  | versus jasper_core vertebrates:<br>FOXI1, Foxd3,              |
| dyads_m3<br>(129 sites)           |  | versus jasper_core vertebrates:<br>no match                   |

B) Motifs found in peak list obtained with tag threshold 7 (1642 peaks)

| Motif                             | Logo                                                                               | 3 Top hits in databases                                                    |
|-----------------------------------|------------------------------------------------------------------------------------|----------------------------------------------------------------------------|
| oligos_7nt_mkv4_m1<br>(159 sites) | 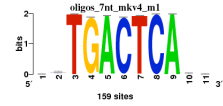  | versus<br><u>jaspar_core vertebrates:</u><br>AP1, NFE2L1::MafG,<br>NFE2L2, |
| oligos_7nt_mkv4_m2<br>(208 sites) |   | versus<br><u>jaspar_core vertebrates:</u><br>no match                      |
| oligos_7nt_mkv4_m3<br>(177 sites) |   | versus<br><u>jaspar_core vertebrates:</u><br>no match                      |
| dyads_m1<br>(8 sites)             |   | versus<br><u>jaspar_core vertebrates:</u><br>TLX1::NFIC,                   |
| dyads_m2<br>(157 sites)           |   | versus<br><u>jaspar_core vertebrates:</u><br>NFIC, TLX1::NFIC,             |
| dyads_m3<br>(151 sites)           |  | versus<br><u>jaspar_core vertebrates:</u><br>ARID3A,                       |

C) Motifs found in peak list obtained with tag threshold 8 (708 peaks)

| Motif                         | Logo                                                                                | 3 Top hits in databases                                              |
|-------------------------------|-------------------------------------------------------------------------------------|----------------------------------------------------------------------|
| oligos_7nt_mkv4<br>(81 sites) | 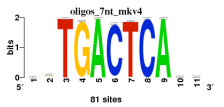 | versus <u>jaspar_core vertebrates:</u><br>AP1, NFE2L1::MafG, NFE2L2, |
| dyads_m1<br>(34 sites)        |  | versus <u>jaspar_core vertebrates:</u><br>TLX1::NFIC,                |
| dyads_m2<br>(33 sites)        |  | versus <u>jaspar_core vertebrates:</u><br>TLX1::NFIC, Hand1::Tcf2a,  |
| dyads_m3<br>(49 sites)        |  | versus <u>jaspar_core vertebrates:</u><br>FOXI1, MEF2A, FOXL1,       |

Sequences within  $\pm 100$  bp from the peak center positions were extracted from the human genome. The program **peak-motifs** from the RSA-tools (Thomas-Chollier et al. 2011, RSAT peak-motifs: motif analysis in full-size ChIP-seq datasets, Nucleic Acids Res. 40:e31) was used for *de novo* motif discovery with the following options and parameters: discovery modes “over-represented words” and “over-represented word-pairs”, oligomer length 6, number of motifs per algorithms 3, search on both strands.

**Table S2. Distribution of in vivo and matrix-predicted NFI sites on the mouse genome**

| <b>Total number of sites</b>  | <b>NFI predicted sites</b> | <b>NFI in vivo sites</b> |
|-------------------------------|----------------------------|--------------------------|
| Total                         | 61492                      | 4794                     |
| Intergenic regions            | 35054                      | 2138                     |
| Upstream (5kb)                | 2942                       | 428                      |
| 5'UTR exons                   | 95                         | 47                       |
| Coding exons                  | 1404                       | 106                      |
| Introns                       | 24348                      | 1966                     |
| 3'UTR exons                   | 667                        | 73                       |
| Downstream (5kb)              | 3079                       | 232                      |
|                               |                            |                          |
| <b>Number of sites per Mb</b> |                            |                          |
| Average for the genome        | 24                         | 1.85                     |
| Intergenic regions            | 20.7                       | 1.26                     |
| Upstream (5kb)                | 27                         | 3.93                     |
| 5'UTR exons                   | 24.9                       | 12.27                    |
| Coding exons                  | 39.5                       | 2.97                     |
| Introns                       | 25                         | 2.02                     |
| 3'UTR exons                   | 29.9                       | 3.26                     |
| Downstream (5kb)              | 28.3                       | 2.13                     |

Table S3. **Distribution of NFI in vivo sites surrounding miRNA loci.**

|                                                 | <b>miRNA<br/>transcribed<br/>regions</b> | <b>Upstream 1kb<br/>regions</b> | <b>Downstream 1<br/>kb regions</b> |
|-------------------------------------------------|------------------------------------------|---------------------------------|------------------------------------|
| <i>Total bases</i>                              | 10292047                                 | 201161                          | 183023                             |
| <i>NFI site count</i>                           | 77                                       | 3                               | 0                                  |
| <i>NFI site density</i>                         | 7.4815E-06                               | 1.49134E-05                     | 1.0928E-05                         |
| <i>NFI site density per Mb</i>                  | 7.4                                      | 14.9                            | 0                                  |
| <i>Number of miRNAs<br/>containing NFI site</i> | 43                                       | 3                               | 0                                  |

In total 203 annotated miRNAs in the mouse genome were used in analysis. Lists of miRNAs that contain NFI sites in either transcribed regions, 1kb upstream or 1kb downstream regions are deposited online at Gene Expression Omnibus (GEO) database under the accession number GSE15844.

**Table S4 Predicted and occupied site distribution at NFI-C-regulated and non-regulated genes**

|                                                                                                                 | Predicted NFI sites | Occupied NFI sites |
|-----------------------------------------------------------------------------------------------------------------|---------------------|--------------------|
| Total number of sites                                                                                           | 61,492              | 14,487             |
| Number of sites overlapping NFI-C non-regulated genes (gene bodies and +/- 5kb regions)                         | 7,966               | 2,412              |
| Number of sites overlapping NFI-C up-regulated genes (gene bodies and +/- 5kb regions)                          | 1,579               | 617                |
| Number of sites outside NFI-C up-regulated genes                                                                | 59,913              | 13,870             |
| Density of sites overlapping NFI-C non-regulated genes (gene bodies and +/- 5kb regions), in number of sites/Mb | 16.9                | 5.1                |
| Density of sites overlapping NFI-C up-regulated genes (gene bodies and +/- 5kb regions), in number of sites/Mb  | 20.3                | 7.9                |
| Density of sites outside NFI-C up-regulated genes, in number of sites/Mb                                        | 22.5                | 5.2                |

For the group of 1286 NFI-C up-regulated genes (difference in expression level >0.5) and the group of 7594 NFI-C non-regulated genes (difference in expression level <0.05) we extended gene body regions for 5kb upstream and downstream. The table shows the total numbers and densities of NFI predicted sites (score >85) and in vivo NFI sites (threshold of 5 tags) mapping in the gene body and +/- 5kb regions of NFI-C non-regulated genes, up-regulated genes and outside up-regulated genes. Densities are expressed in average binding sites per Mb.
